# Supplementary material
Source: PubMed Central journal article supplement (PMC4808447)
Supplement: NIHMS751719-supplement-01.pdf [file NIHMS751719-supplement-01.pdf]

# Cycloartane Triterpenes from the Aerial Parts of *Actaea racemosa*

Ayano Imai,<sup>†‡</sup> David C. Lankin,<sup>†‡</sup> Dejan Nikolić,<sup>†‡</sup> Soyoun Ahn,<sup>†‡</sup> Richard B. van Breemen,<sup>†‡</sup>  
Norman R. Farnsworth,<sup>†‡§</sup> James B. McAlpine,<sup>‡</sup> Shao-Nong Chen,<sup>†‡</sup> and Guido F. Pauli<sup>†‡\*</sup>

<sup>†</sup>UIC/NIH Center for Botanical Dietary Supplements Research, <sup>‡</sup>Department of Medicinal Chemistry and Pharmacognosy, College of Pharmacy, University of Illinois at Chicago, Chicago, IL 60612, United States

\*\* Deceased September 10, 2011

## ■ SUPPORTING INFORMATION

| No. | Content                                                                                     | Page |
|-----|---------------------------------------------------------------------------------------------|------|
| S1  | ROESY Spectrum of <b>1</b> (700 MHz) in Pyridine- <i>d</i> <sub>5</sub>                     | S-2  |
| S2  | gCOSY Spectrum of <b>1</b> (900 MHz) in Pyridine- <i>d</i> <sub>5</sub>                     | S-3  |
| S3  | Multiplicity Edited gHSQC Spectrum of <b>1</b> (700 MHz) in Pyridine- <i>d</i> <sub>5</sub> | S-4  |
| S4  | gHMBC Spectrum of <b>1</b> (700 MHz) in Pyridine- <i>d</i> <sub>5</sub>                     | S-5  |
| S5  | <sup>1</sup> H NMR Spectrum of <b>2</b> (900 MHz) in Pyridine- <i>d</i> <sub>5</sub>        | S-6  |
| S6  | gCOSY Spectrum of <b>2</b> (600 MHz) in Pyridine- <i>d</i> <sub>5</sub>                     | S-7  |
| S7  | gHMBC Spectrum of <b>2</b> (600 MHz) in Pyridine- <i>d</i> <sub>5</sub>                     | S-8  |
| S8  | gHSQC Spectrum of <b>2</b> (600 MHz) in Pyridine- <i>d</i> <sub>5</sub>                     | S-9  |
| S9  | <sup>1</sup> H NMR Spectrum of <b>3</b> (900 MHz) in Pyridine- <i>d</i> <sub>5</sub>        | S-10 |
| S10 | <sup>1</sup> H NMR Spectrum of <b>4</b> (900 MHz) in Pyridine- <i>d</i> <sub>5</sub>        | S-11 |
| S11 | <sup>1</sup> H NMR Spectrum of <b>5</b> (900 MHz) in Pyridine- <i>d</i> <sub>5</sub>        | S-12 |
| S12 | <sup>1</sup> H NMR Spectrum of <b>6</b> (900 MHz) in Pyridine- <i>d</i> <sub>5</sub>        | S-13 |
| S13 | <sup>1</sup> H NMR Spectrum of <b>7</b> (900 MHz) in Pyridine- <i>d</i> <sub>5</sub>        | S-14 |
| S14 | <sup>1</sup> H NMR Spectrum of <b>8</b> (900 MHz) in Pyridine- <i>d</i> <sub>5</sub>        | S-15 |
| S15 | <sup>1</sup> H NMR Spectrum of <b>9</b> (900 MHz) in Pyridine- <i>d</i> <sub>5</sub>        | S-16 |

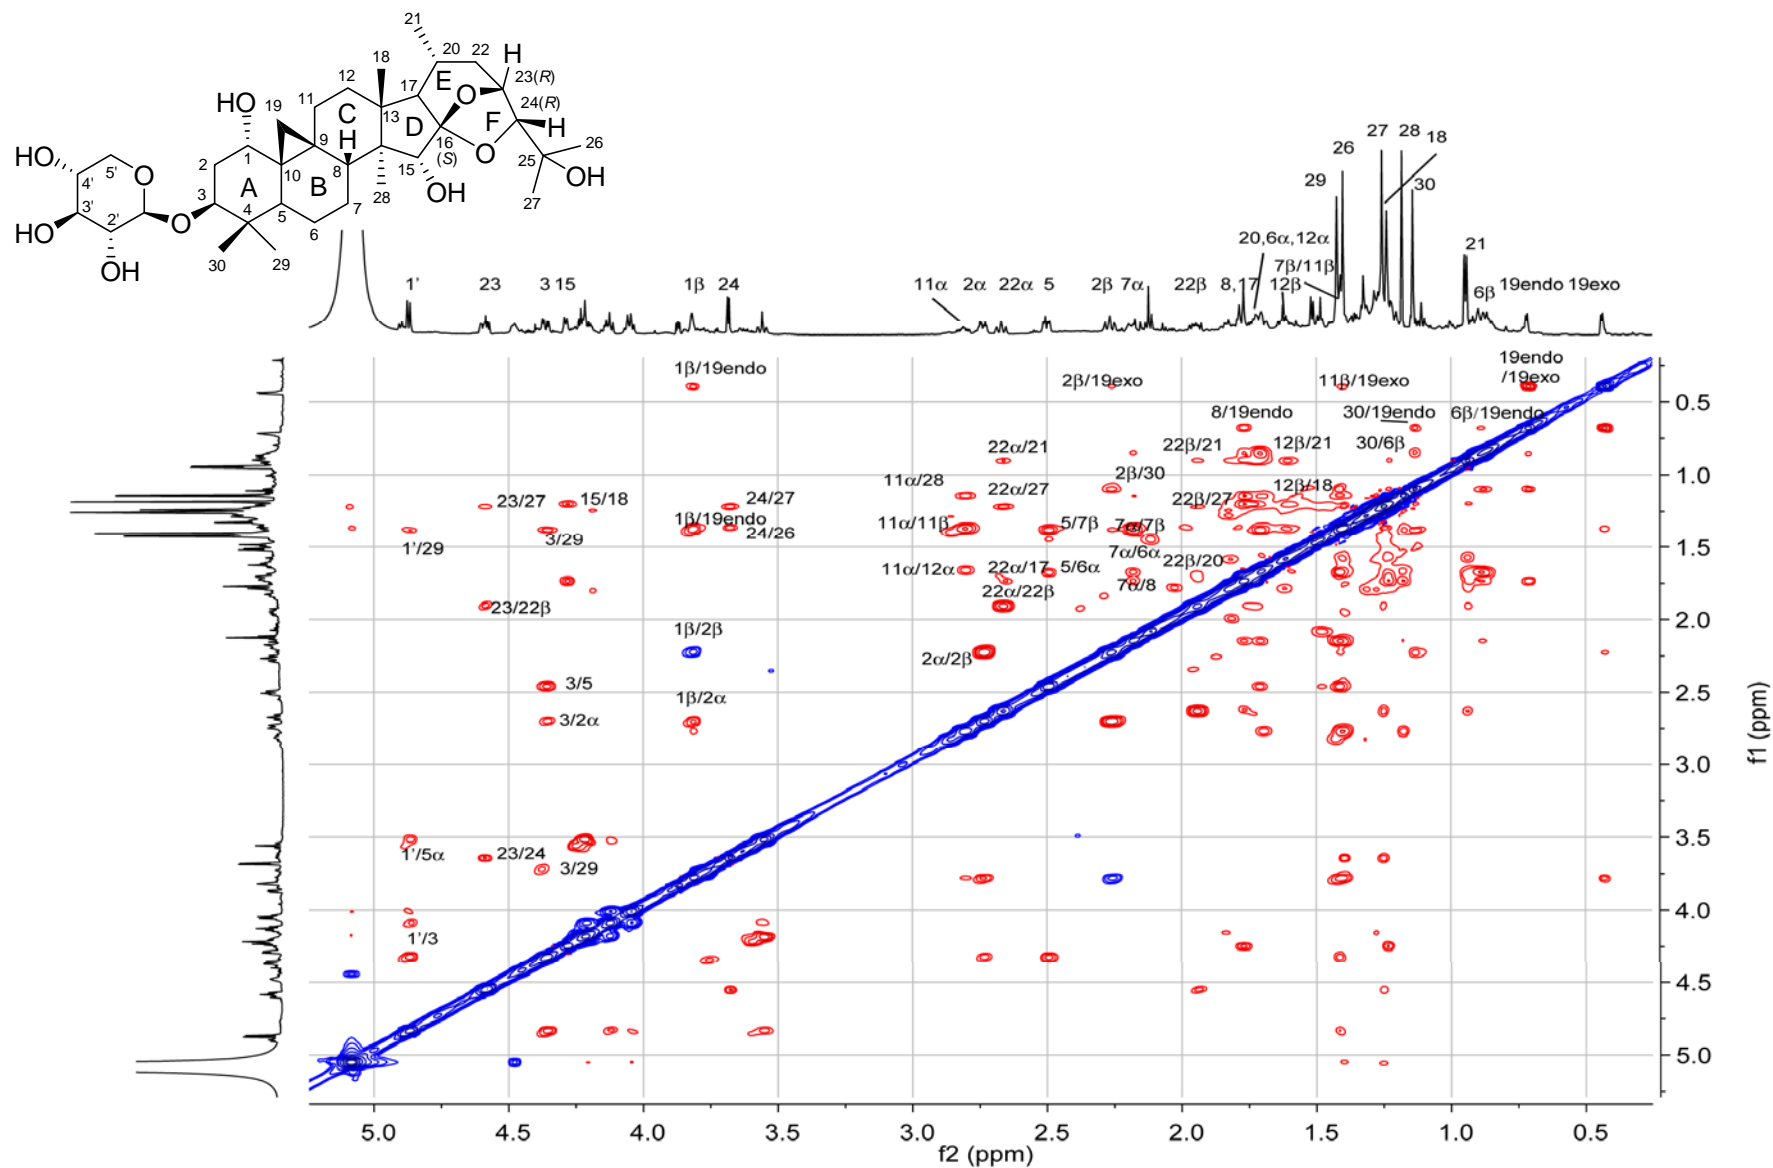

**Figure S1.** ROESY spectrum of **1** (700 MHz) in pyridine-*d*<sub>5</sub>.

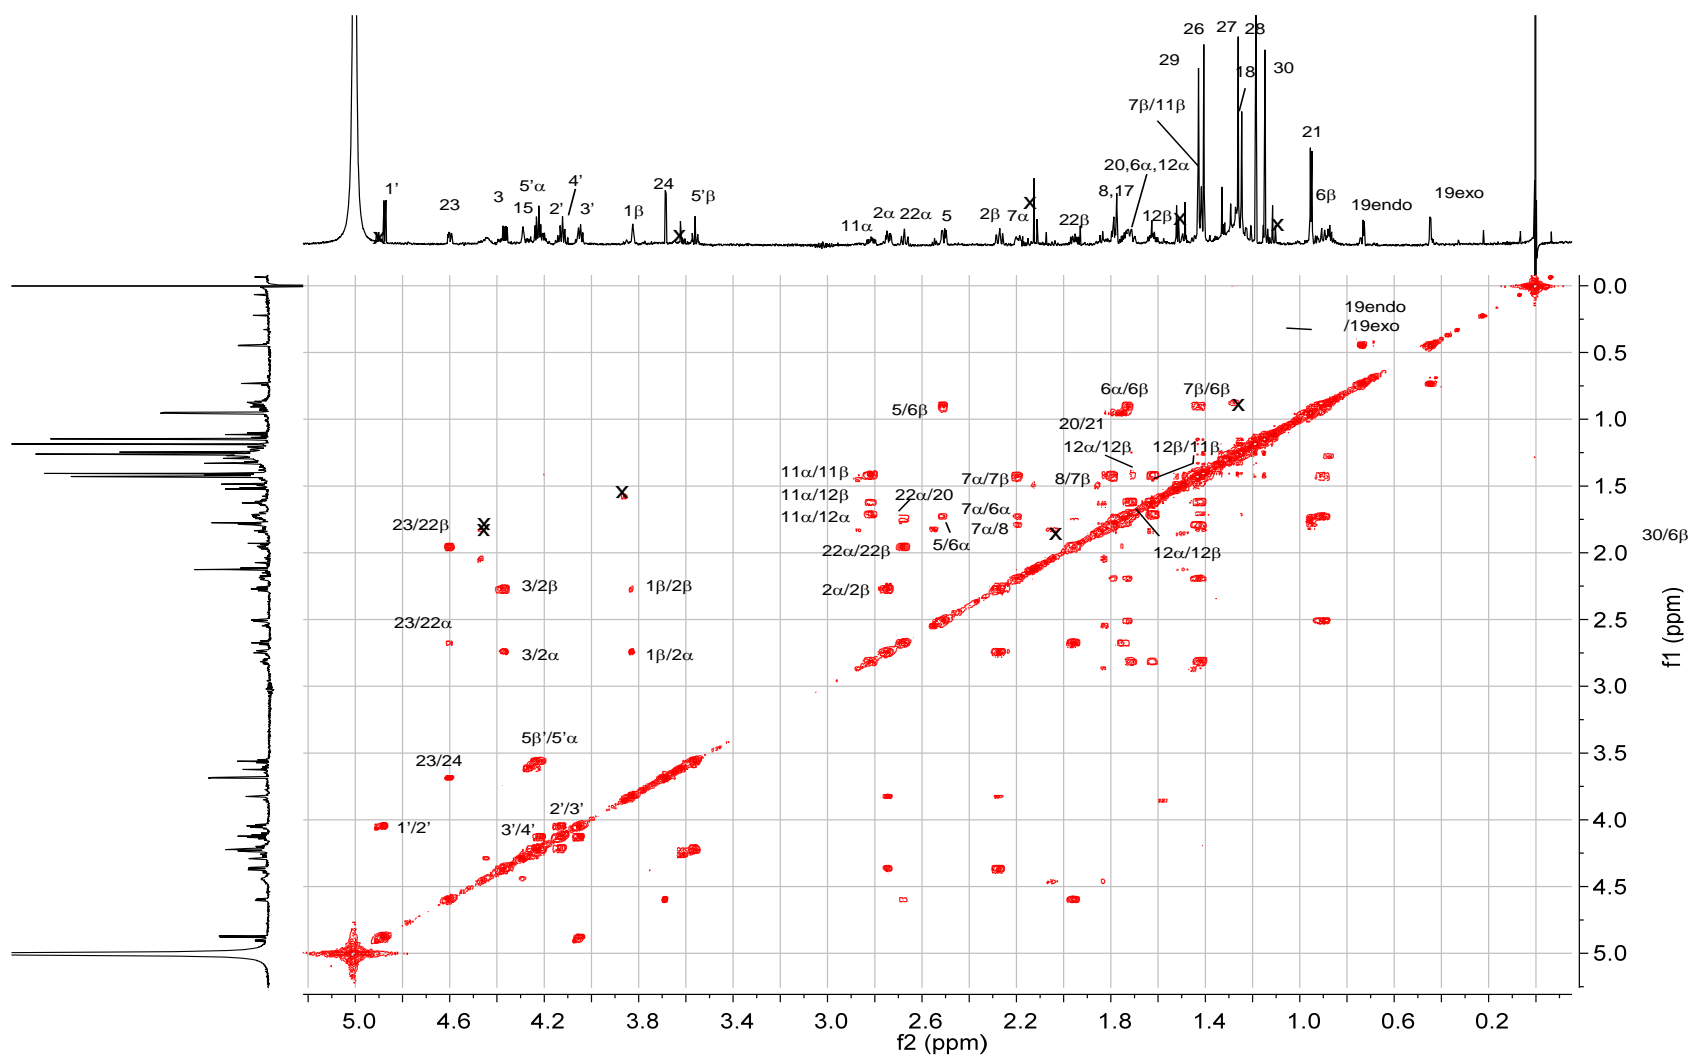

**Figure S2.** gCOSY spectrum of **1** (900 MHz) in pyridine-*d*<sub>5</sub>.

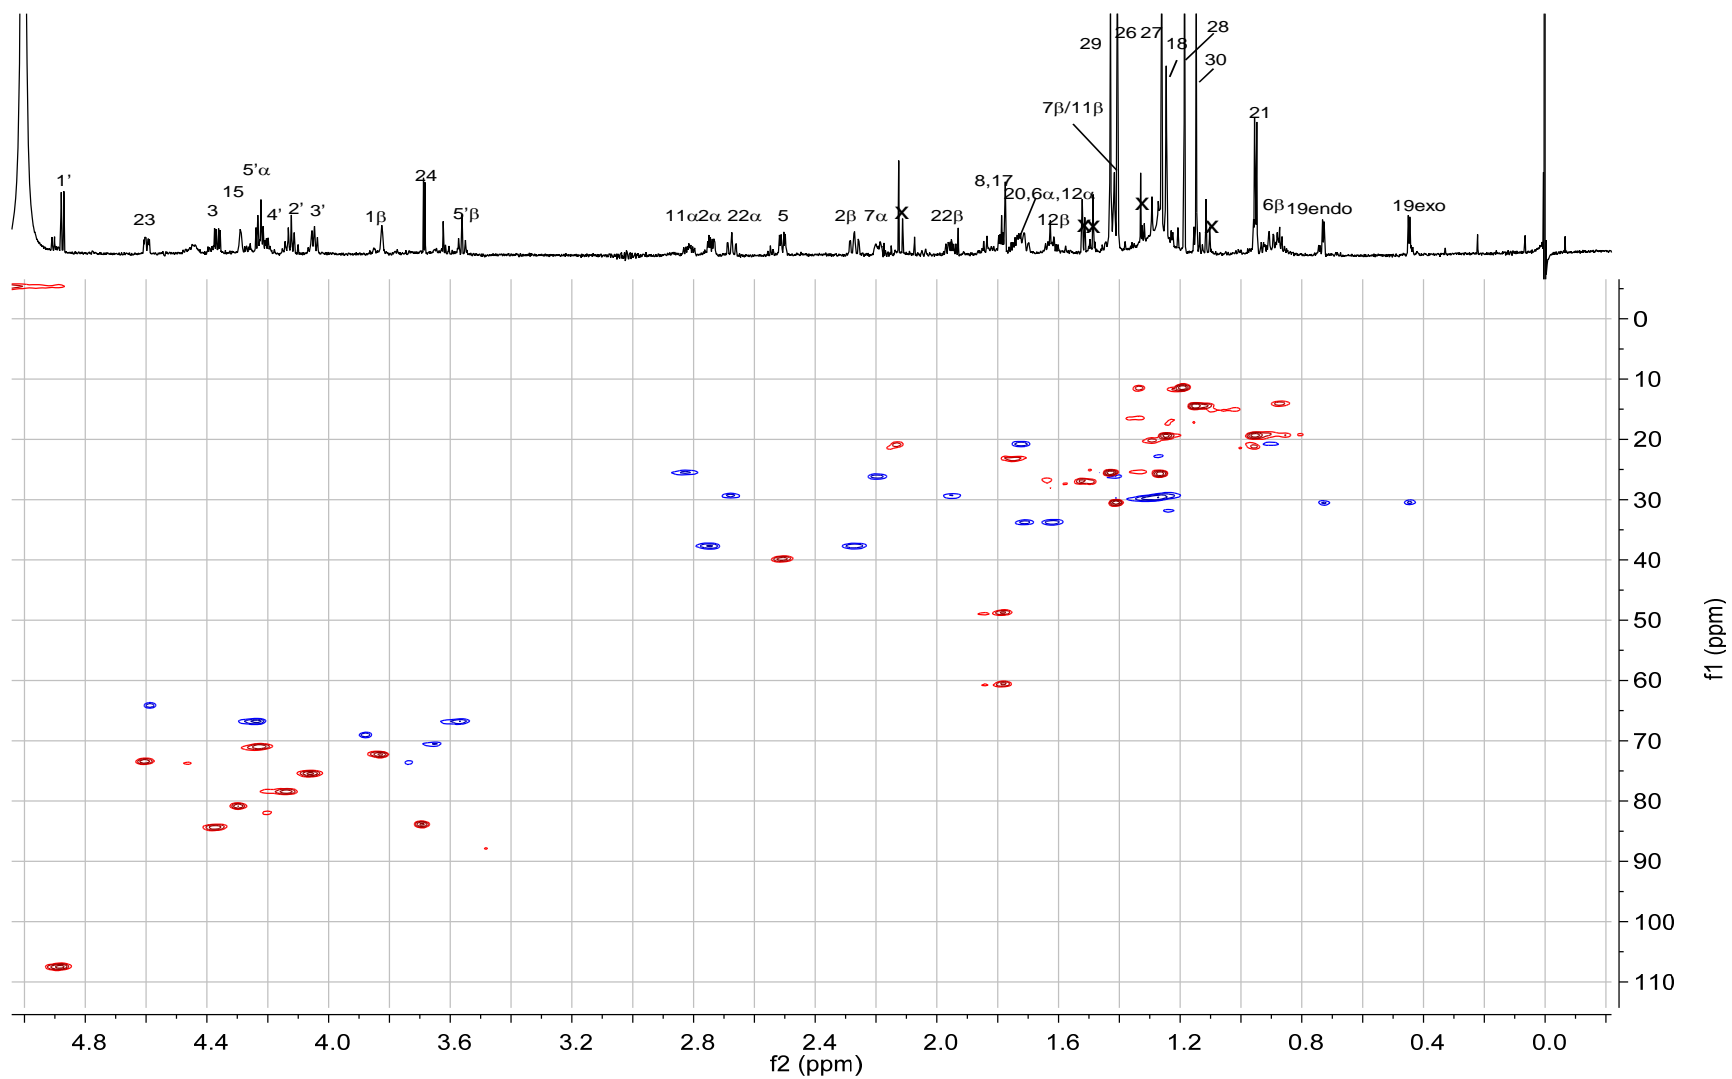

**Figure S3.** Multiplicity edited gHSQC spectrum of **1** (700 MHz) in pyridine-*d*<sub>5</sub>.

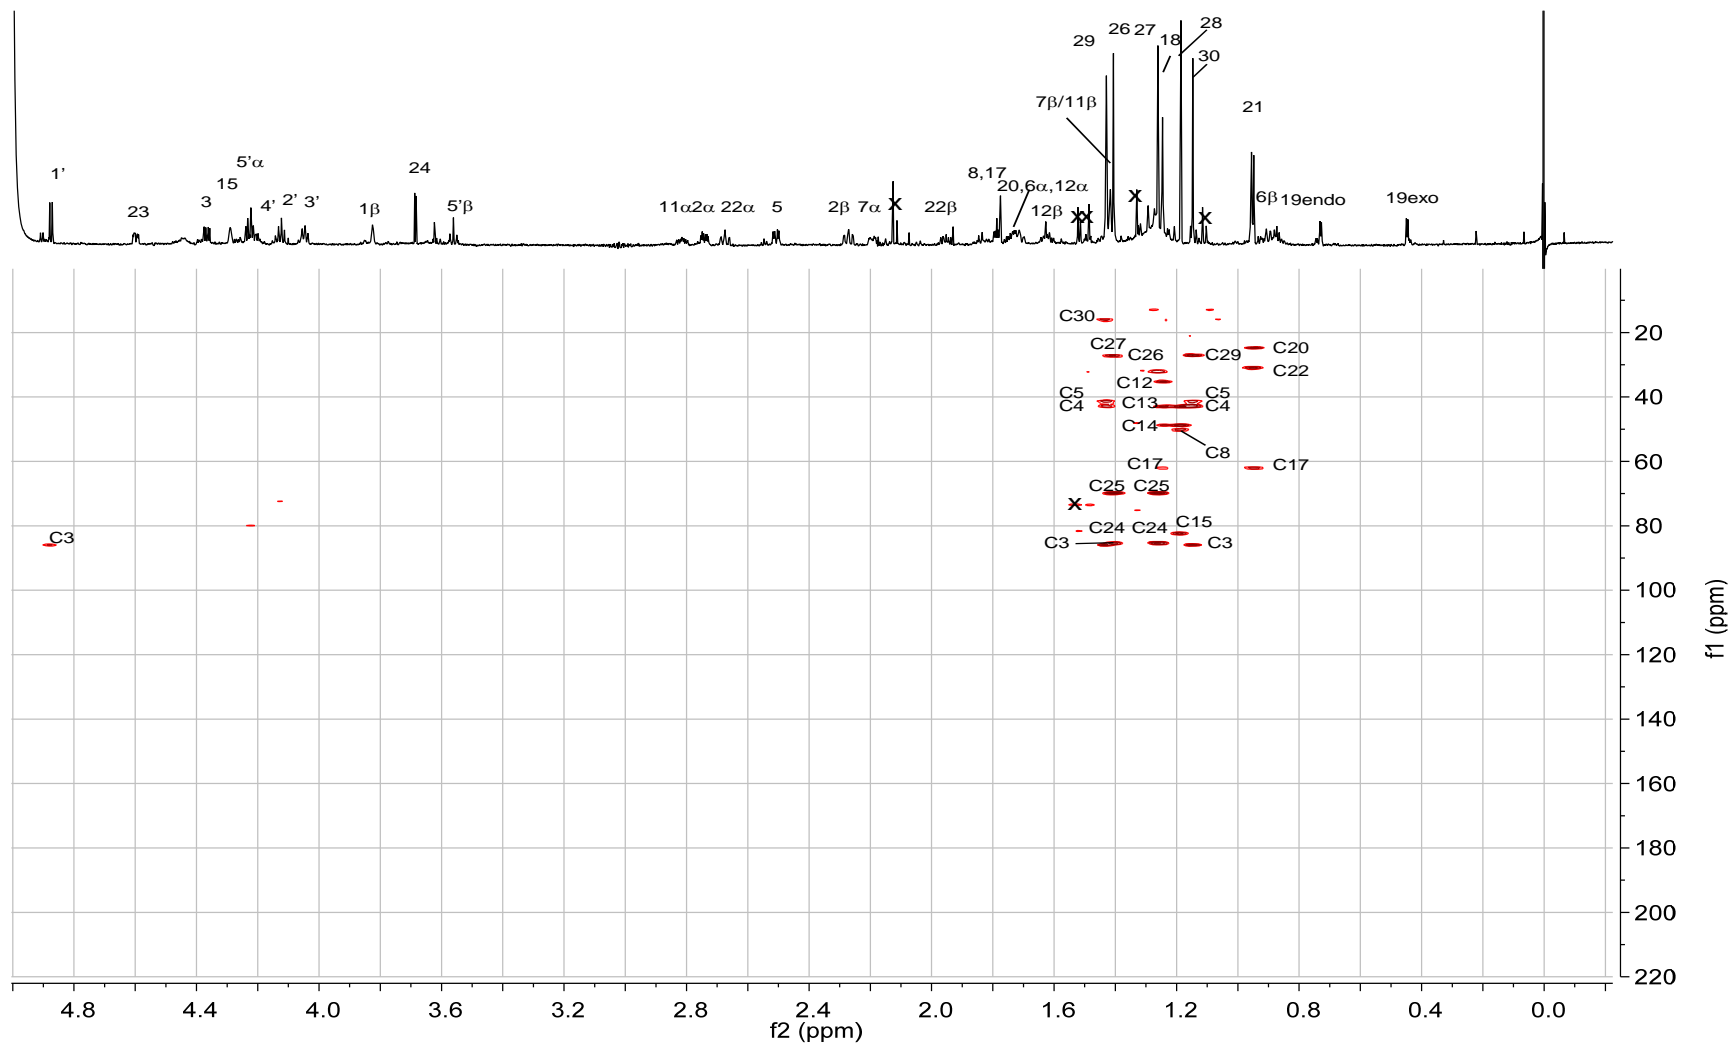

**Figure S4.** gHMBC spectrum of **1** (700 MHz) in pyridine-*d*<sub>5</sub>.

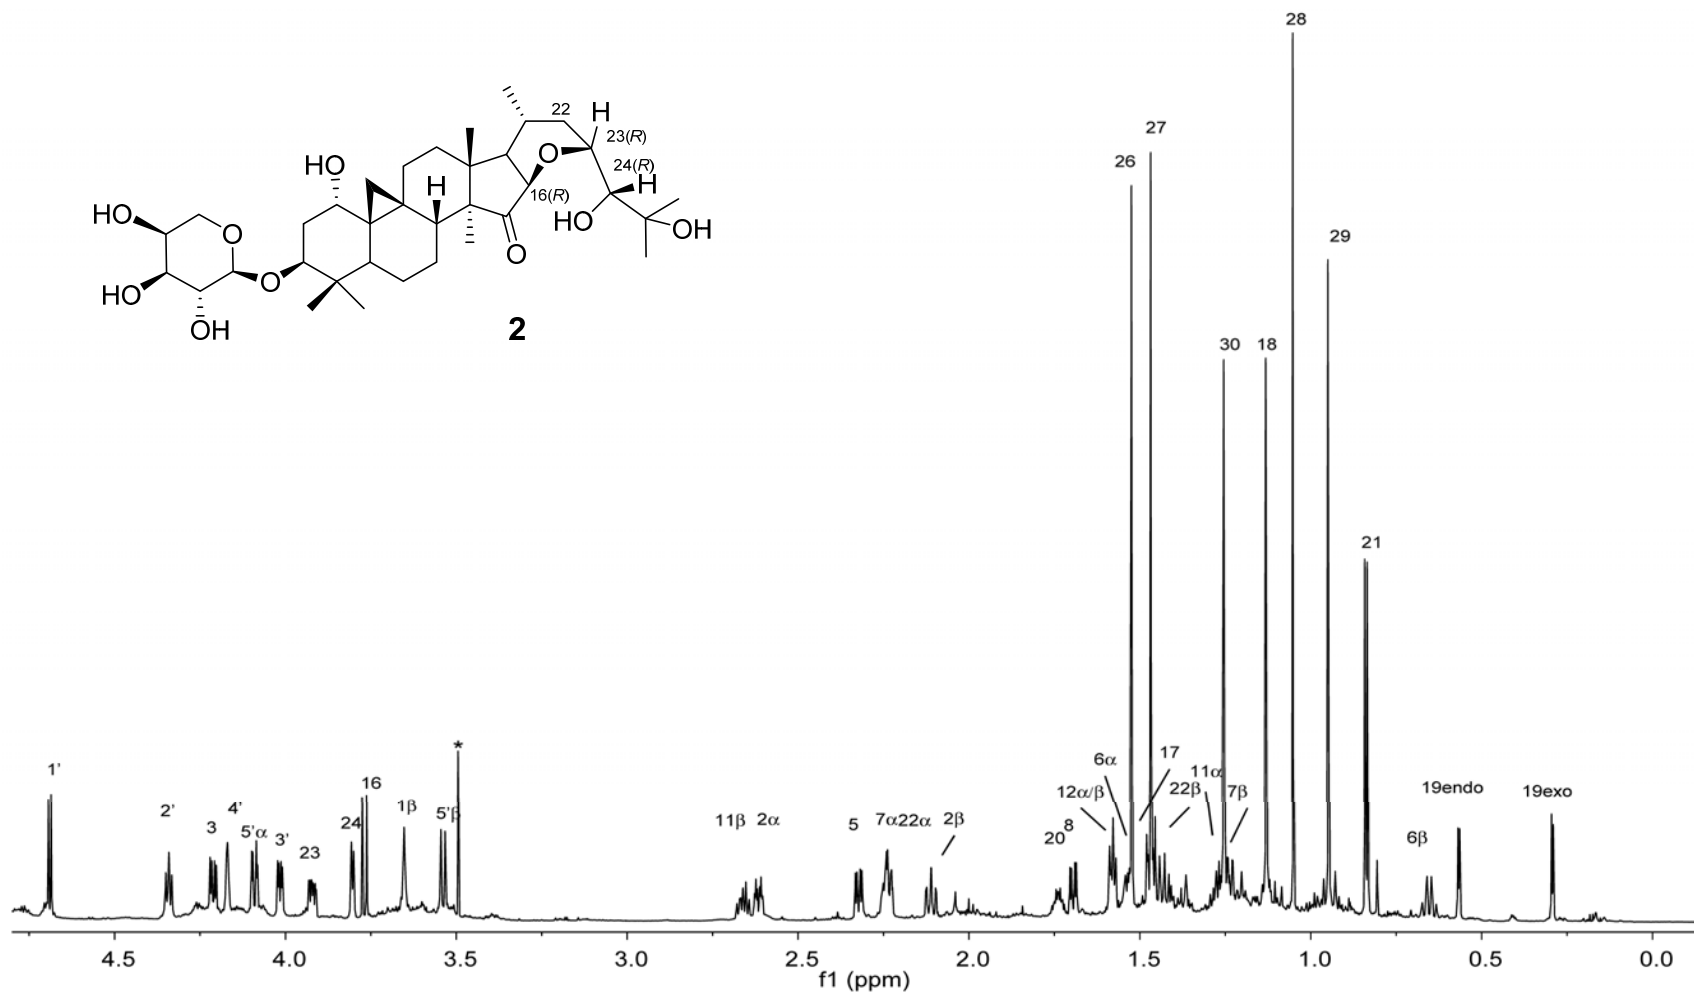

**Figure S5.**  $^1\text{H}$  NMR spectrum of **2** (900 MHz) in  $\text{pyridine-}d_5$ . The (\*) indicates residual MeOH.

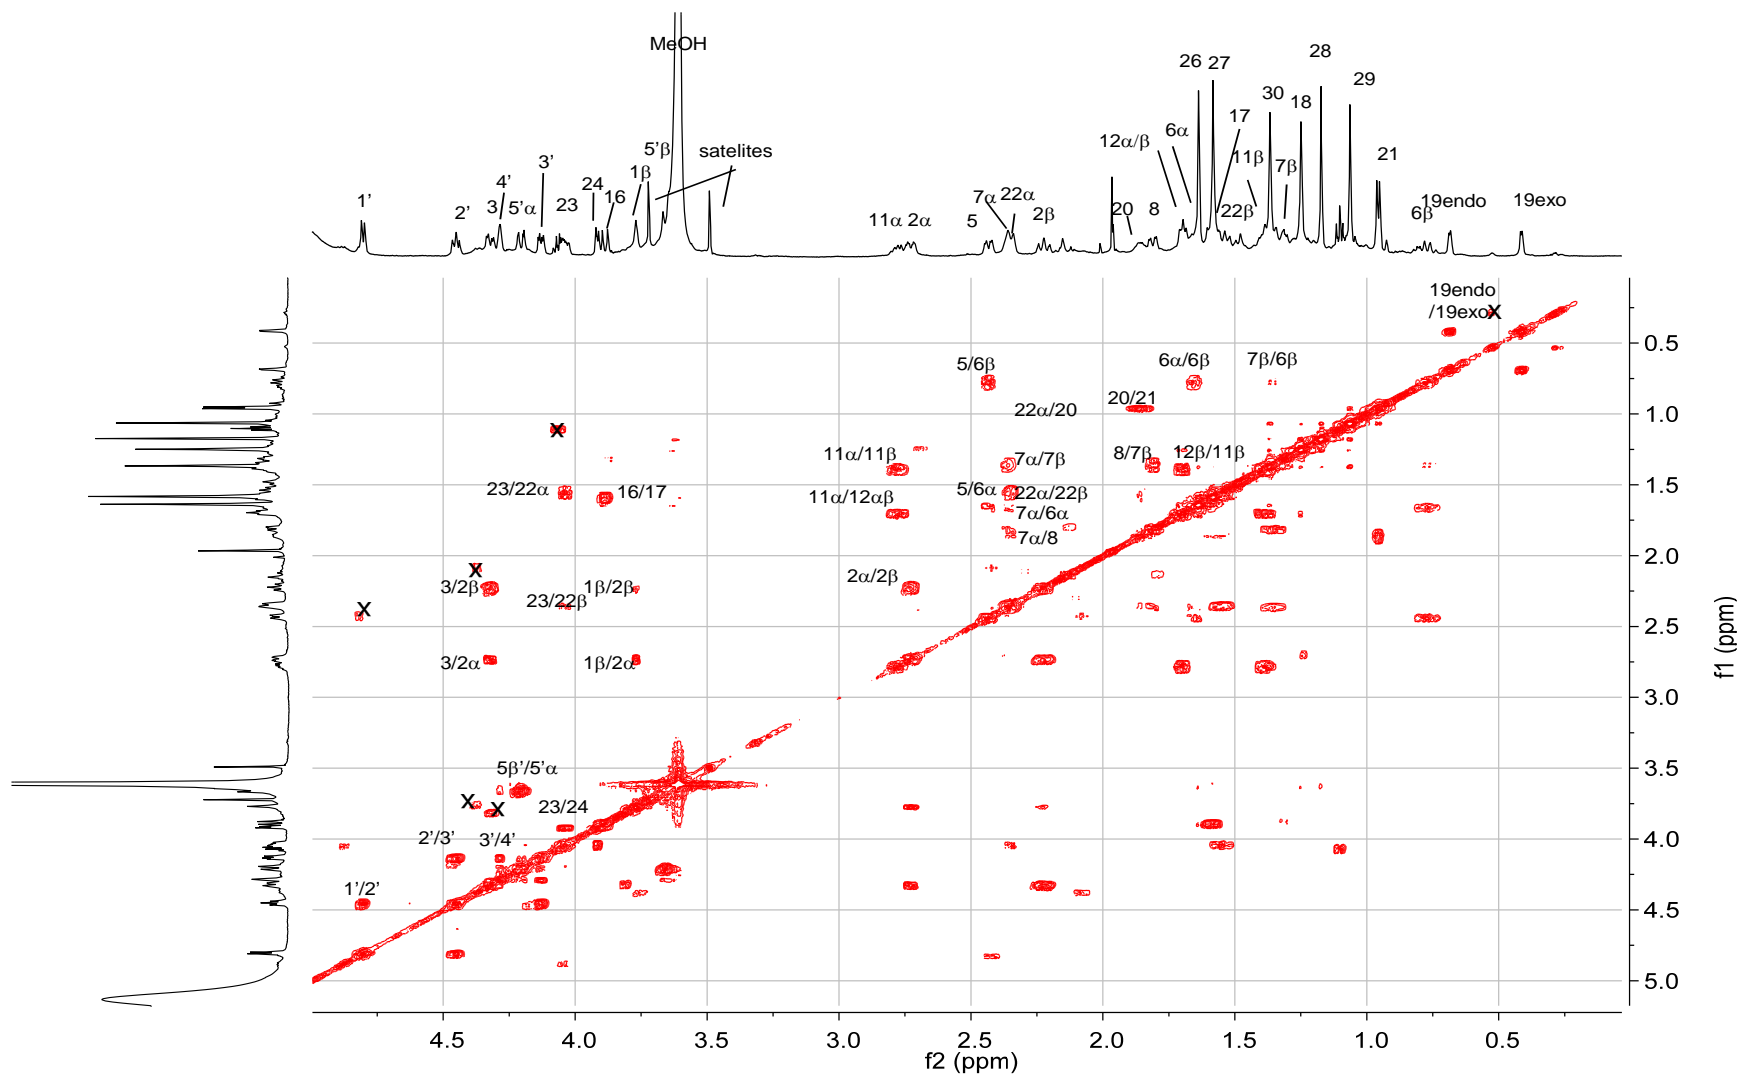

Figure S6. gCOSY spectrum of **2** (600 MHz) in pyridine-*d*<sub>5</sub>.

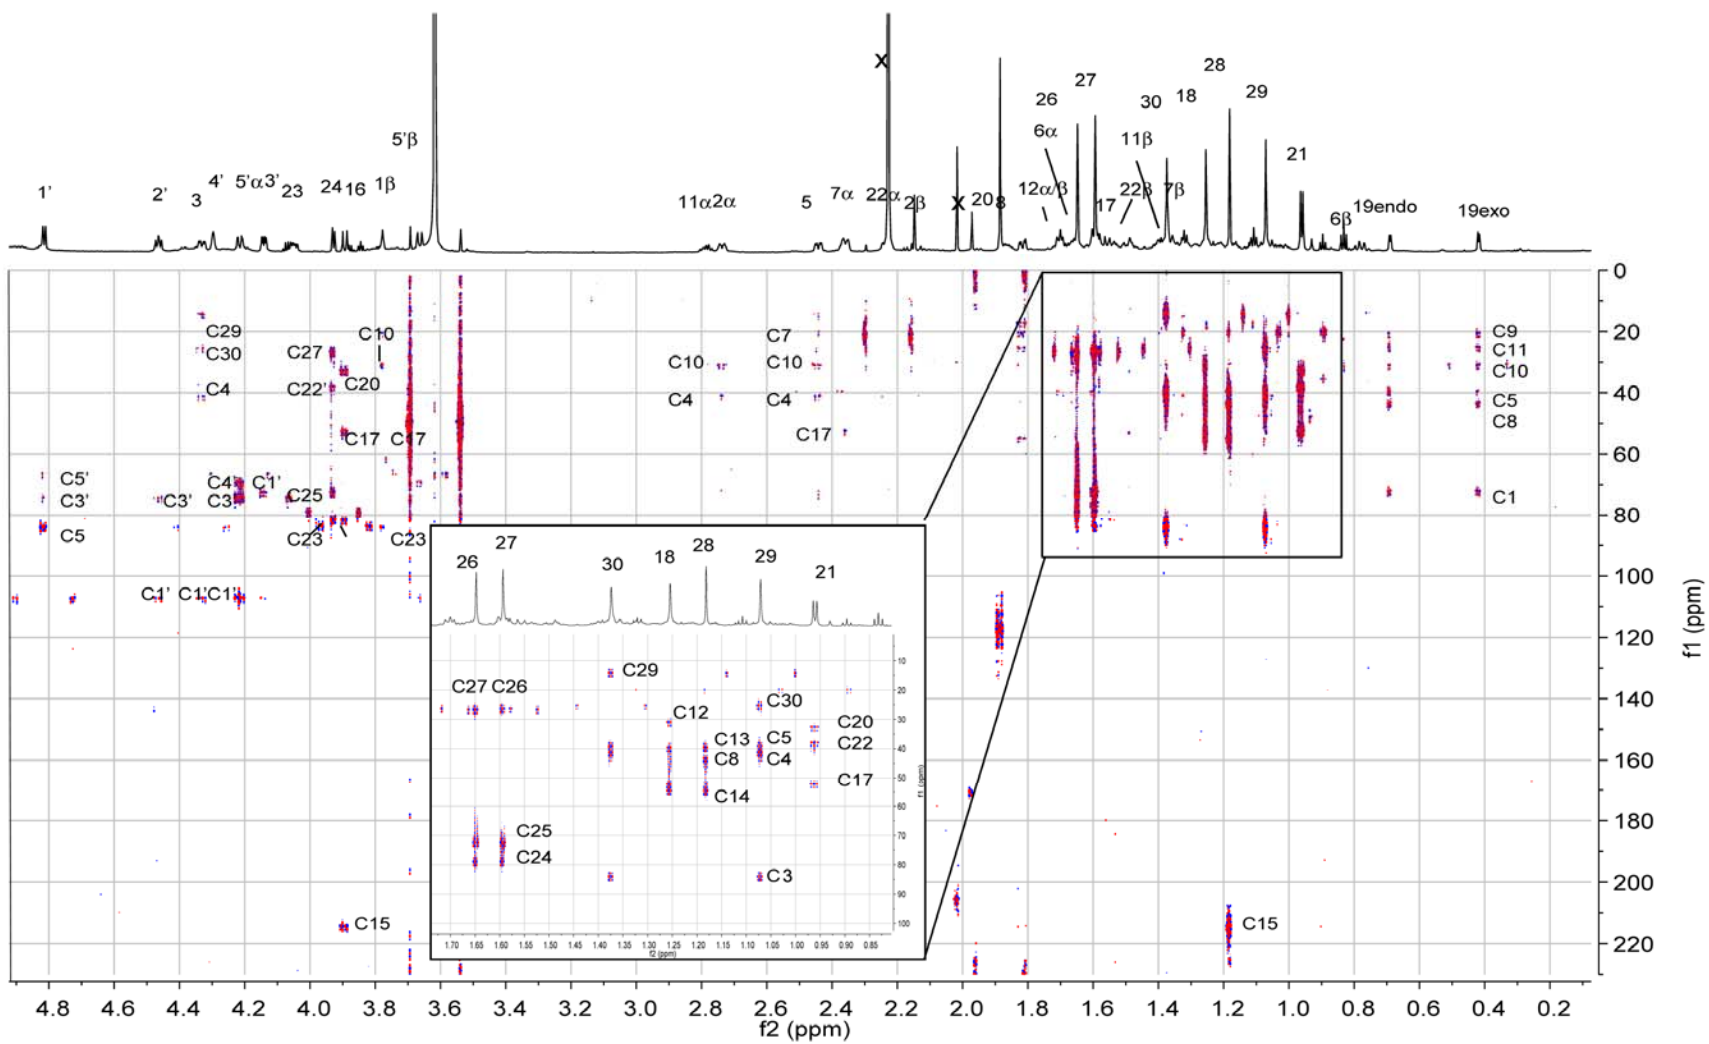

Figure S7. gHMBC spectrum of **2** (600 MHz) in pyridine *d*<sub>5</sub>.



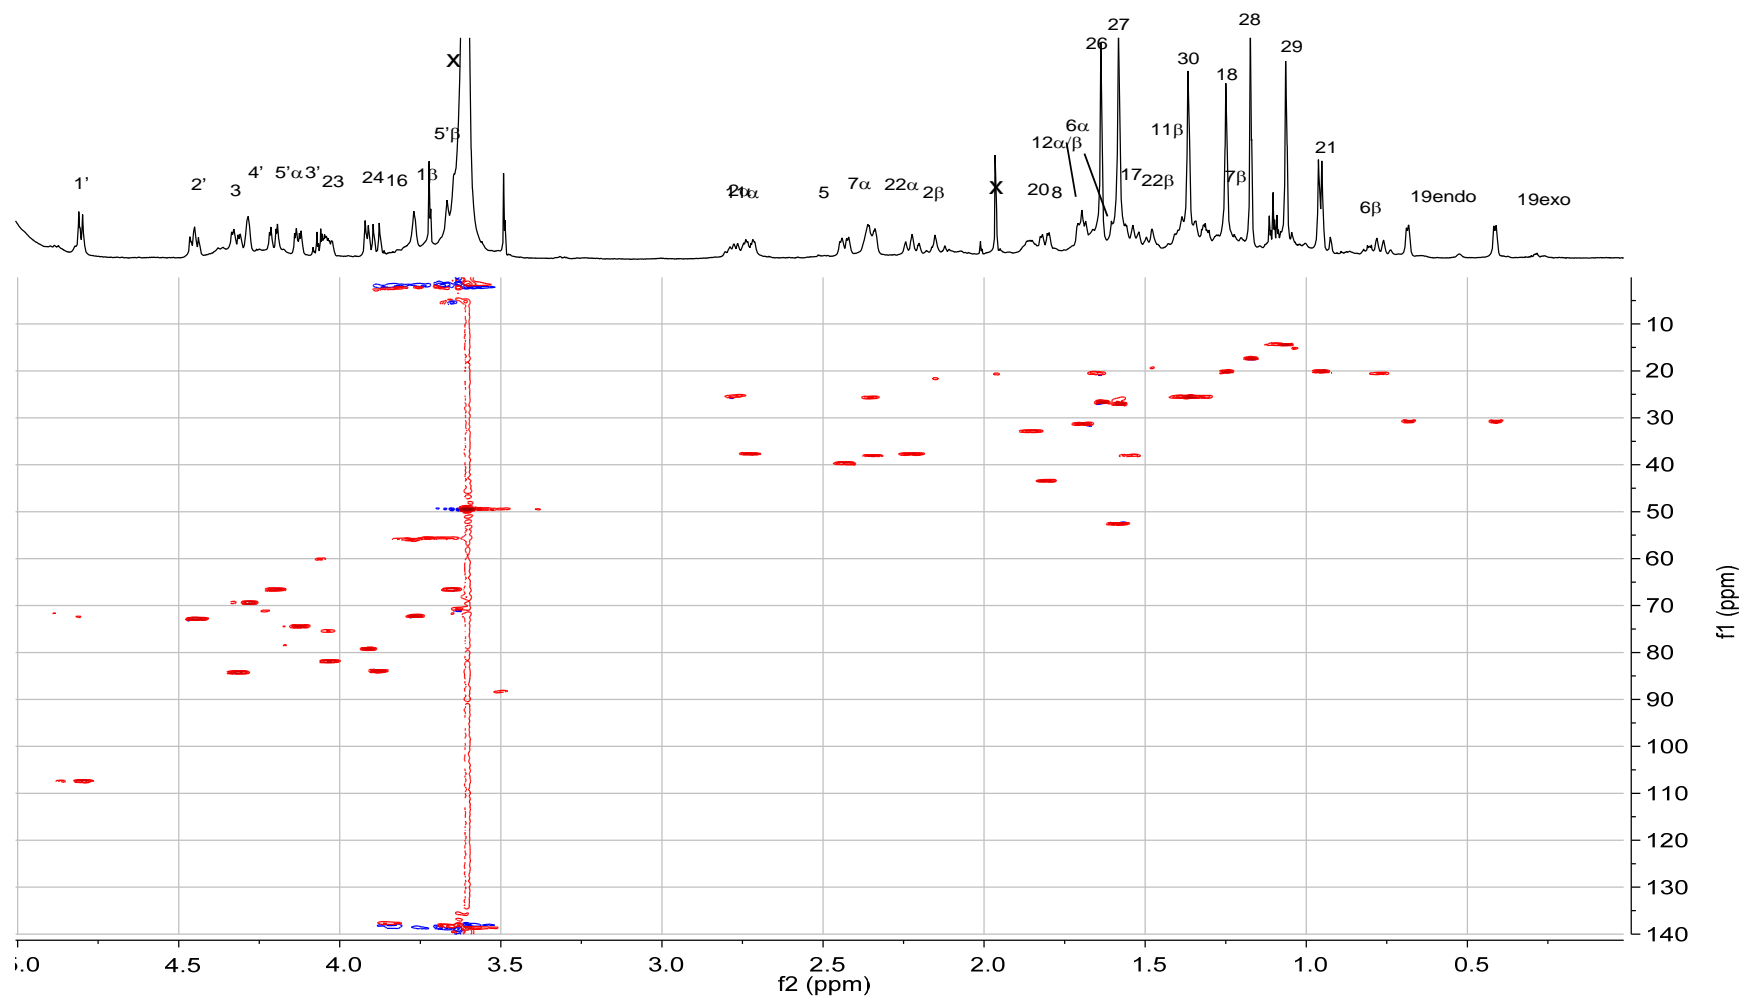

**Figure S8.** gHSQC spectrum of **2** (600 MHz) in pyridine-*d*<sub>5</sub>.

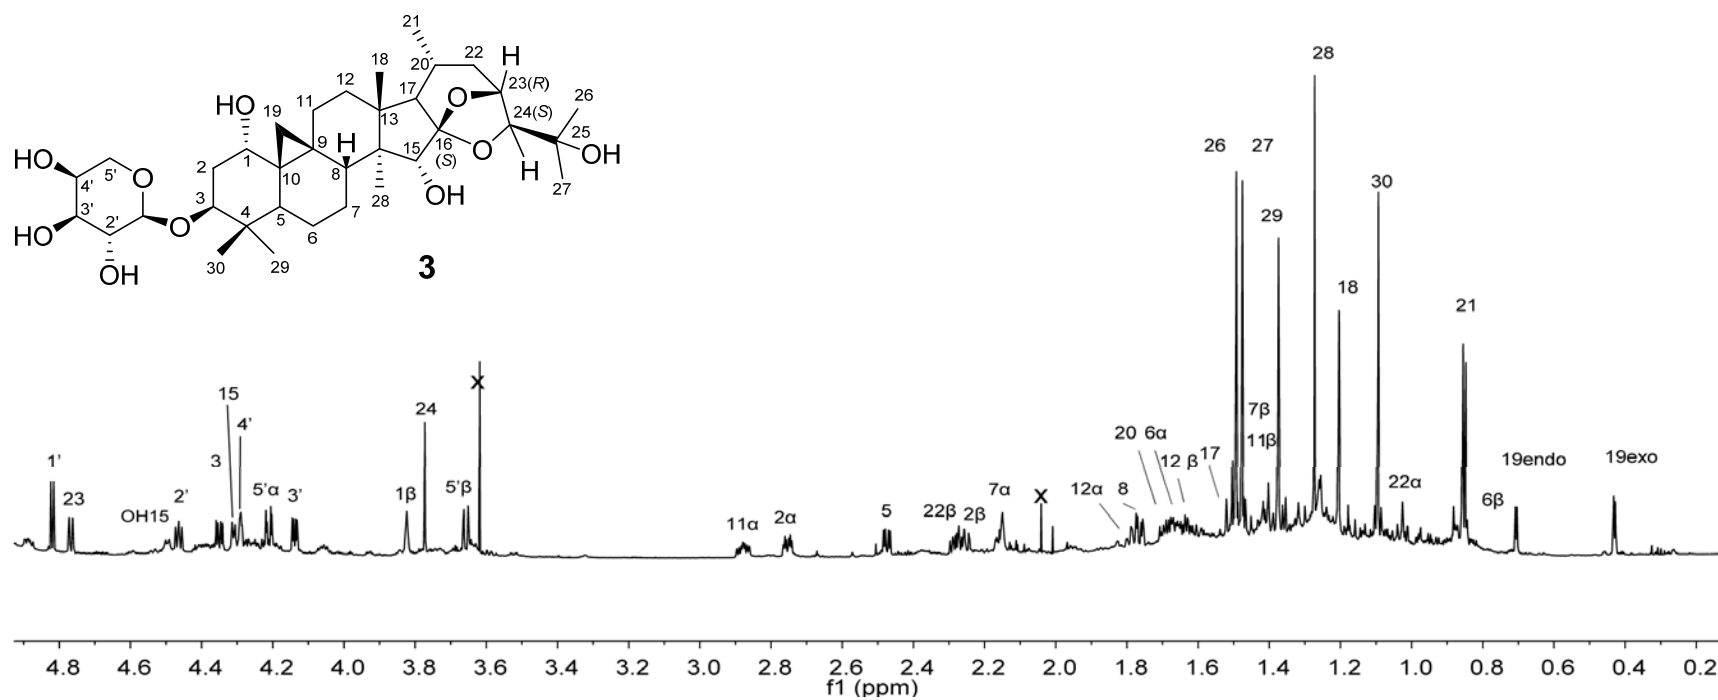

**Figure S9.** <sup>1</sup>H NMR spectrum of **3** (900 MHz) in pyridine-*d*<sub>5</sub>.

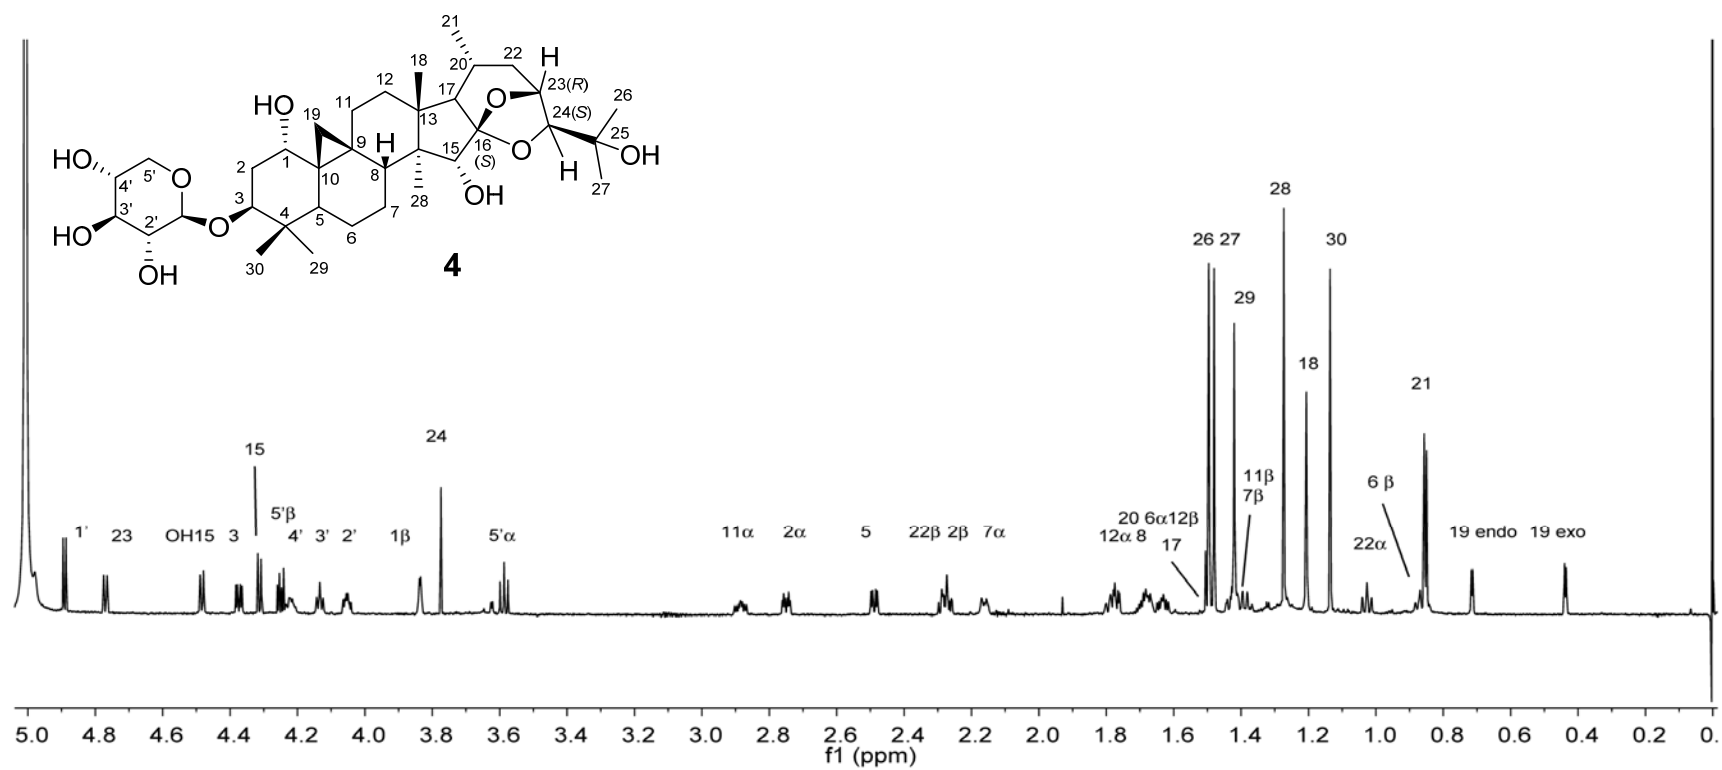

**Figure S10.**  $^1\text{H}$  NMR spectrum of **4** (900 MHz) in  $\text{pyridine-}d_5$ .

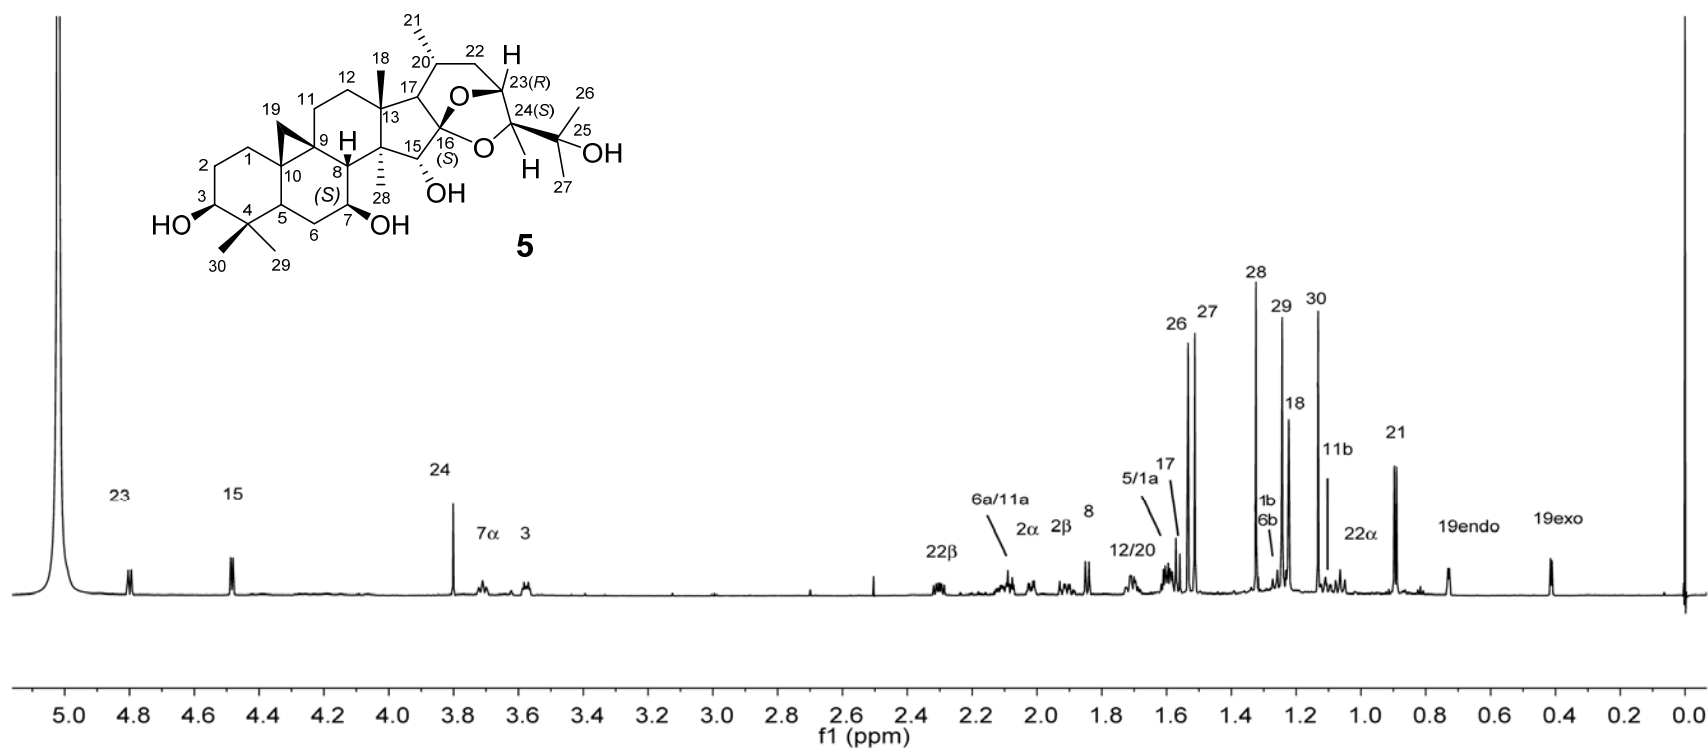

**Figure S11.** <sup>1</sup>H NMR spectrum of **5** (900 MHz) in pyridine-*d*<sub>5</sub>.

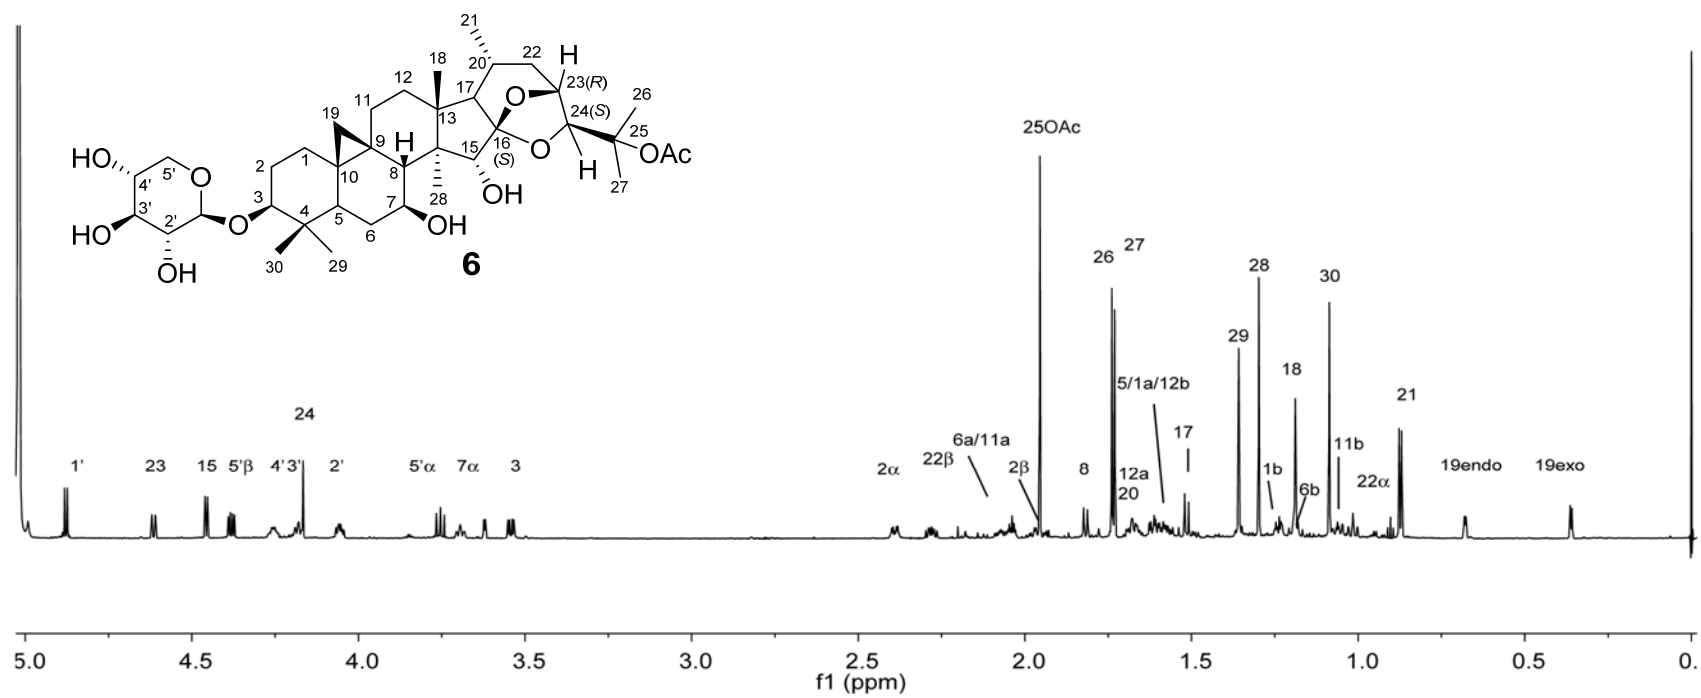

**Figure S12.** <sup>1</sup>H NMR spectrum of **6** (900 MHz) in pyridine-*d*<sub>5</sub>.

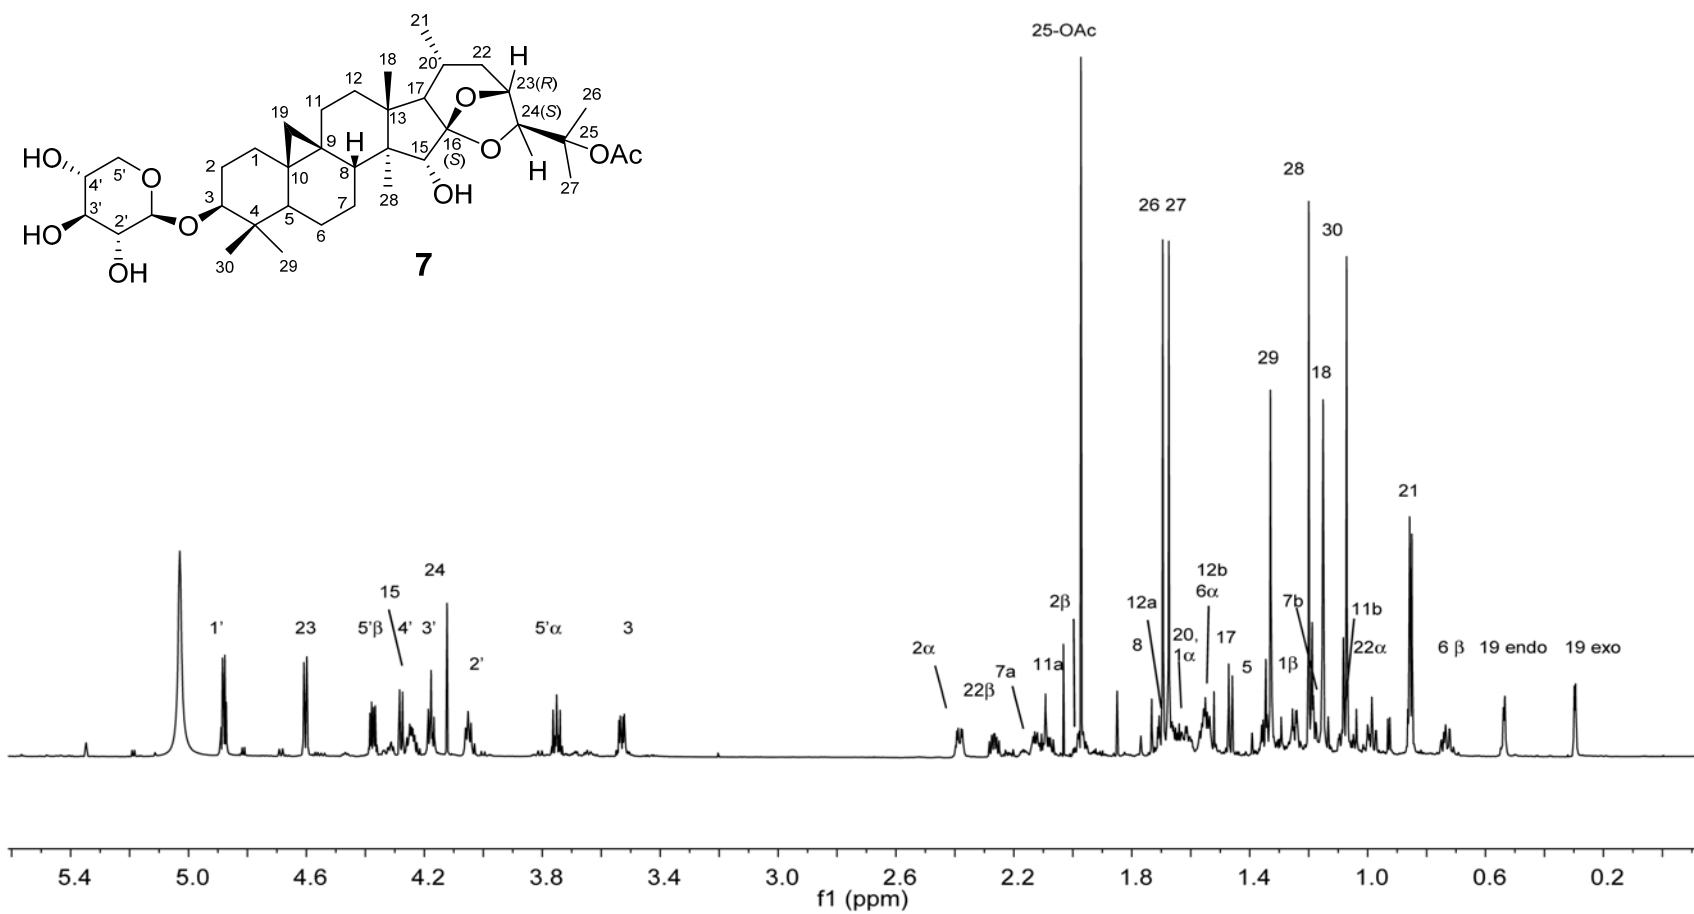

**Figure S13.** <sup>1</sup>H NMR spectrum of 7 (900 MHz) in pyridine-*d*<sub>5</sub>.

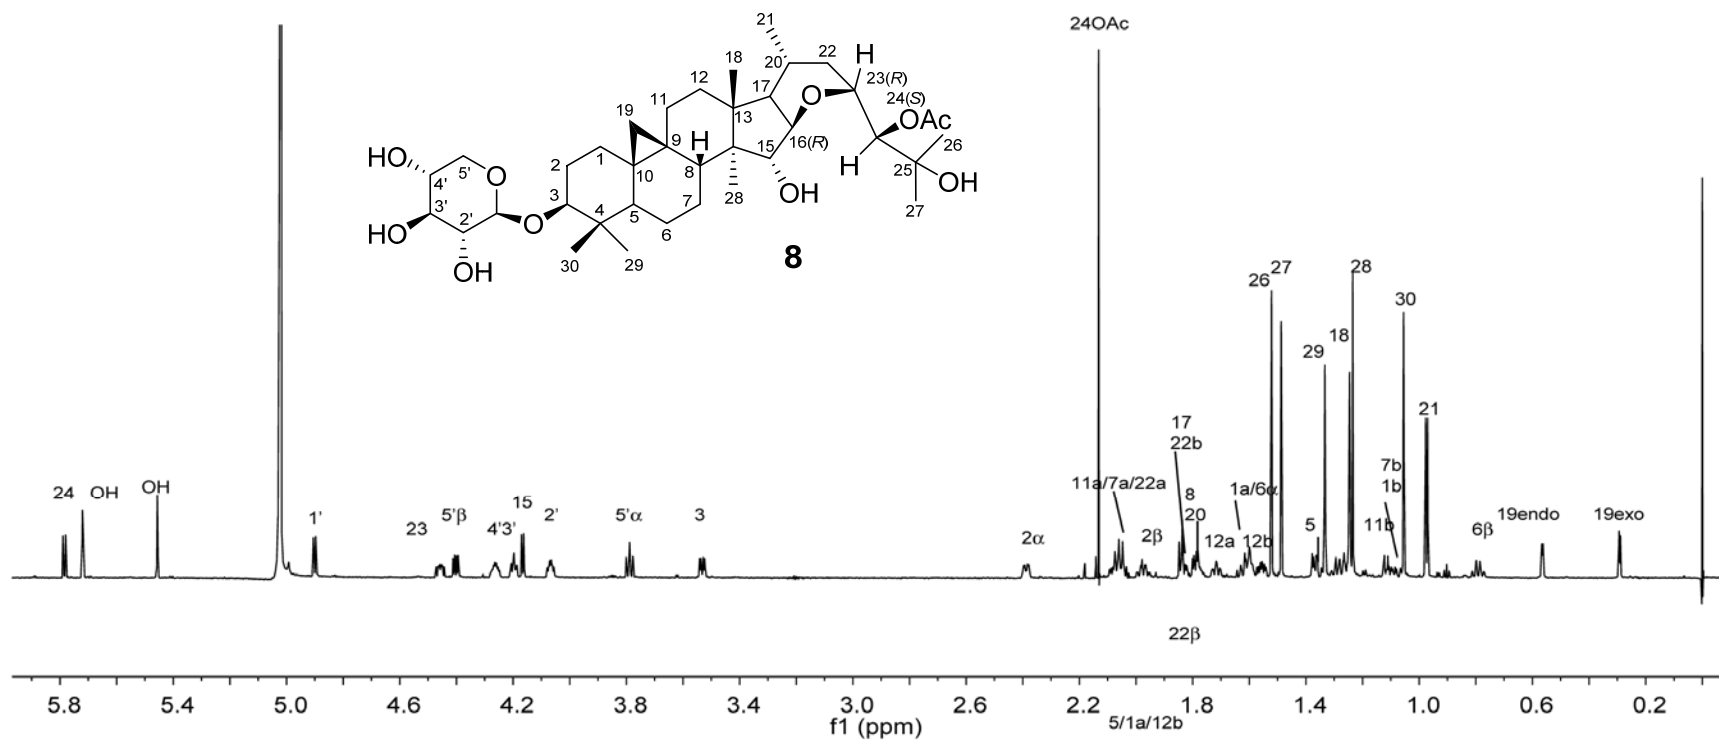

**Figure S14.**  $^1\text{H}$  NMR spectrum of **8** (900 MHz) in  $\text{pyridine-}d_5$ .

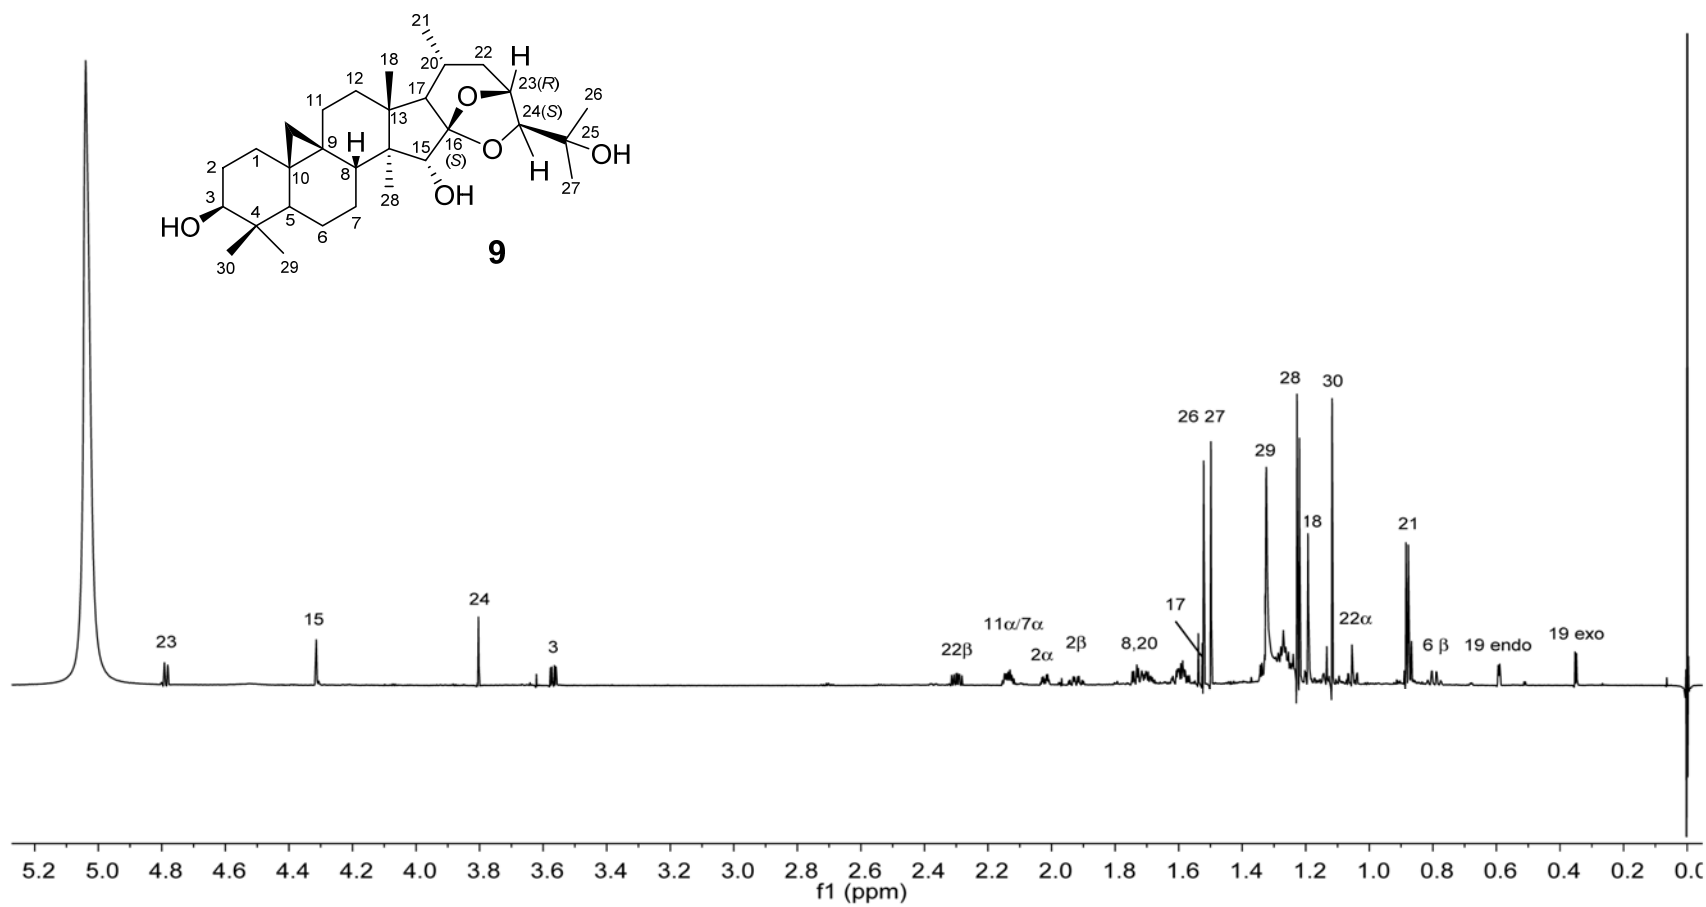

**Figure S15.**  $^1\text{H}$  NMR spectrum of **9** (900 MHz) in  $\text{pyridine-}d_5$ .
